# Supplementary material for: Green Ultrasound Assisted Extraction of trans Rosmarinic Acid from Plectranthus scutellarioides (L.) R.Br. Leaves
Source: MDPI journal article supplement (doi:10.3390/plants8030050), 2019-02-27
Supplement: s1 [file s1]

Article

# Green Ultrasound Assisted Extraction of *trans* Rosmarinic Acid from *Plectranthus scutellarioides* (L.) R.Br. Leaves

Duangjai Tungmunthum<sup>1,2,3,\*</sup>, Laurine Garros<sup>1,2,4</sup>, Samantha Drouet<sup>1,2</sup>, Sullivan Renouard<sup>5</sup>, Eric Lainé<sup>1,2</sup> and Christophe Hano<sup>1,2,\*</sup>

<sup>1</sup> Laboratoire de Biologie des Ligneux et des Grandes Cultures, INRA USC1328 Orleans University, 45067 Orléans Cedex 2, France; laurine.garros@etu.univ-orleans.fr (L.G.); samantha.drouet@univ-orleans.fr (S.D.); eric.laine@univ-orleans.fr (E.L.)

<sup>2</sup> Bioactifs et Cosmétiques, CNRS GDR 3711 Orleans, 45067 Orléans Cedex 2, France

<sup>3</sup> Department of Pharmaceutical Botany, Faculty of Pharmacy, Mahidol University, Bangkok 10400, Thailand

<sup>4</sup> Institut de Chimie Organique et Analytique, CNRS UMR731, Orleans University, 45067 Orléans Cedex 2, France

<sup>5</sup> Institut de Chimie et de Biologie des Membranes et des Nano-objets, CNRS UMR 5248, Bordeaux University, 33600 Pessac, France; sullivan.renouard@u-bordeaux.fr

\* Correspondence to: duangjai.tun@mahidol.ac.th (D.T.); hano@univ-orleans.fr (C.H.); Tel.: +662 6448677-91 (D.T.); Tel.: +33-237-309-753 (C.H.)

## Supplementary Materials:

**Figure S1** Biplot representation of the linear relation between predicted *vs* measured RA contents in the 27 sample extracts. Light blue contours represented  $p = 0.05$ .

**Figure S2** Representative chromatogram of a complete HPLC analysis of an extract of *P. scutellarioides* leaves obtained following USAE showing the presence of RA as main compound. *t*-RA: *trans*-RA (rosmarinic acid); IS: internal standard (4-hydroxychalcone).

**Figure S3** Predicted surface response plots of the antioxidant activity (% of DPPH radical scavenging activity) as a function of (a) ultrasound frequency and ethanol concentration, (b) extraction duration and ultrasound frequency, and (c) extraction duration and ethanol concentration.

**Figure S4** Predicted surface response plots of the antimicrobial activity (% of *Staphylococcus aureus* ACTT6538 growth inhibition) as a function of (a) ultrasound frequency and ethanol concentration, (b) extraction duration and ultrasound frequency, and (c) extraction duration and ethanol concentration.

**Table S1** Individual antioxidant and antimicrobial activities *vs* RA contents in the 27 US extract samples.

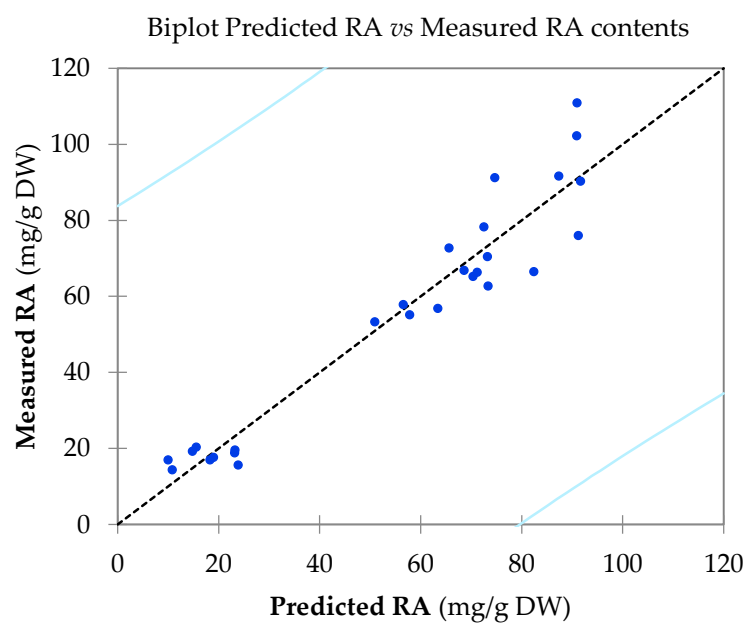

**Figure S1** Biplot representation of the linear relation between predicted *vs* measured RA contents in the 27 sample extracts. Light blue contours represented  $p = 0.05$ .

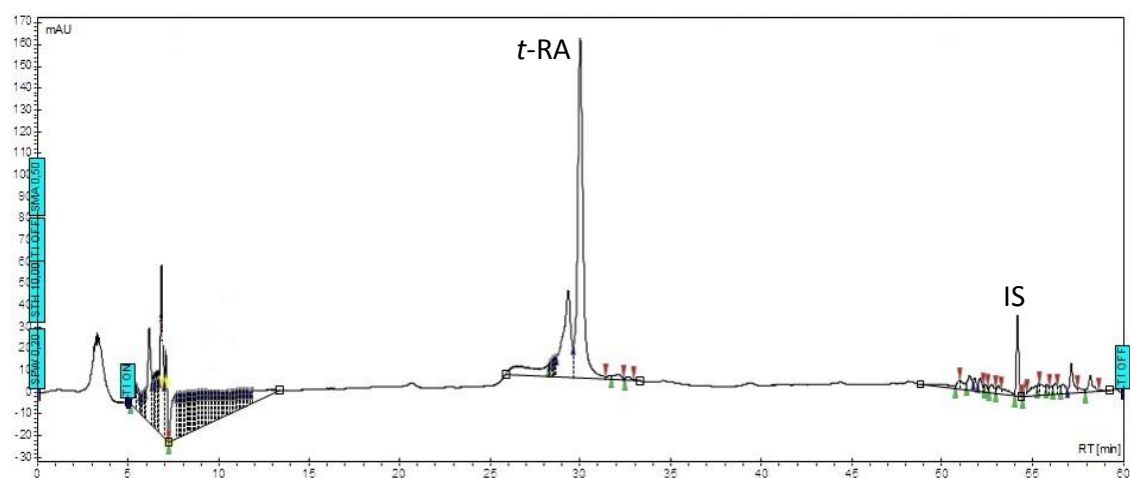

**Figure S2** Representative chromatogram of a complete HPLC analysis of an extract of *P. scutellarioides* leaves obtained following USAE showing the presence of RA as main compound. *t*-RA: trans-RA (rosmarinic acid); IS: internal standard (4-hydroxychalcone).

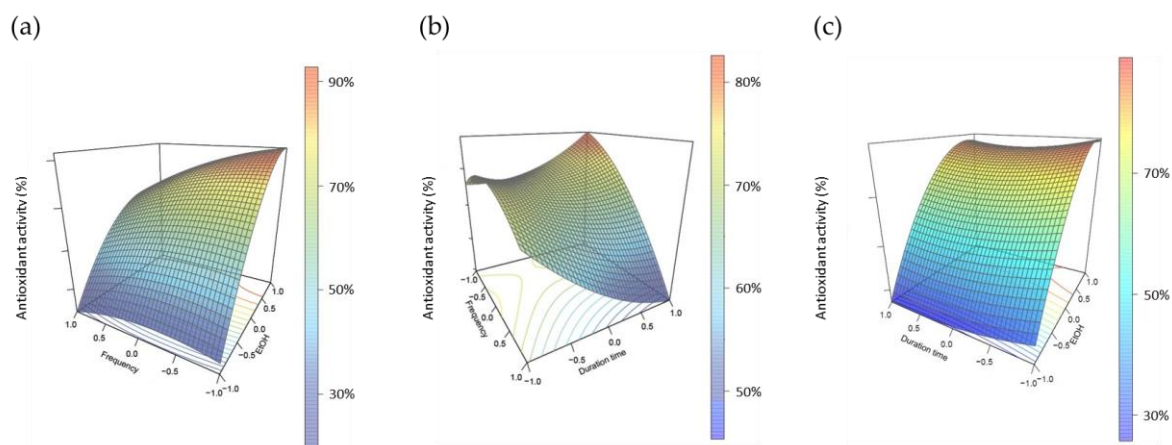

**Figure S3** Predicted surface response plots of the antioxidant activity (% of DPPH radical scavenging activity) as a function of (a) ultrasound frequency and ethanol concentration, (b) extraction duration and ultrasound frequency, and (c) extraction duration and ethanol concentration.

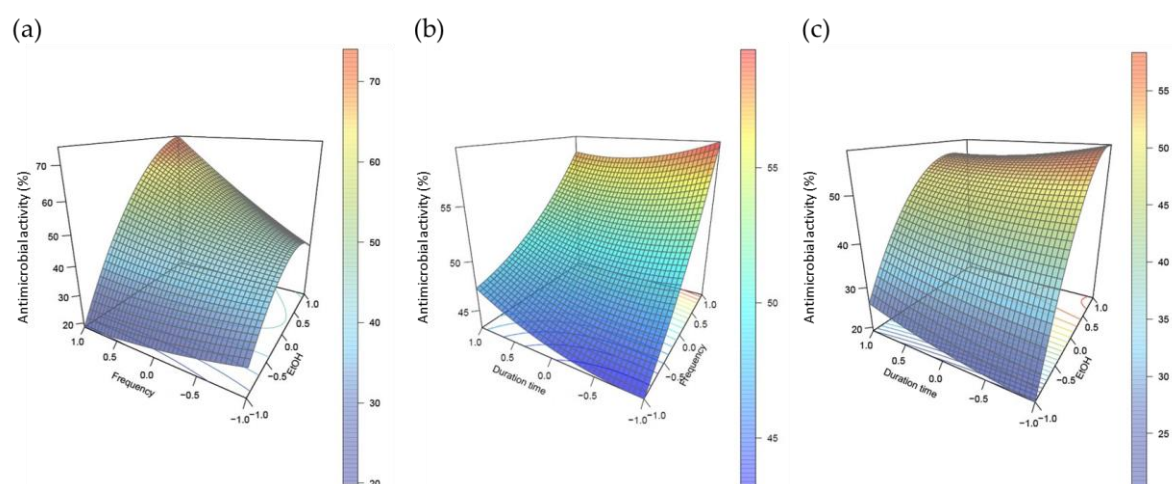

**Figure S4** Predicted surface response plots of the antimicrobial activity (% of *Staphylococcus aureus* ACTT6538 growth inhibition) as a function of (a) ultrasound frequency and ethanol concentration, (b) extraction duration and ultrasound frequency, and (c) extraction duration and ethanol concentration.

**Table S1** Individual antioxidant and antimicrobial activities vs RA contents in the 27 US extract samples.

| Run ID <sup>1</sup> | Antioxidant activity <sup>2</sup> | Antimicrobial activity <sup>3</sup> | RA content (mg/g DW) |
|---------------------|-----------------------------------|-------------------------------------|----------------------|
| Obs1                | 37,31                             | 26,09                               | 16,88                |
| Obs2                | 67,41                             | 30,00                               | 53,21                |
| Obs3                | 79,97                             | 51,20                               | 57,76                |
| Obs4                | 22,66                             | 20,33                               | 18,74                |
| Obs5                | 71,26                             | 41,52                               | 65,15                |
| Obs6                | 79,40                             | 58,80                               | 66,45                |
| Obs7                | 38,09                             | 14,46                               | 17,56                |
| Obs8                | 70,57                             | 73,59                               | 78,18                |
| Obs9                | 79,03                             | 75,11                               | 102,18               |
| Obs10               | 34,09                             | 28,48                               | 19,15                |
| Obs11               | 69,65                             | 52,28                               | 55,11                |
| Obs12               | 87,31                             | 33,15                               | 72,64                |
| Obs13               | 21,71                             | 20,76                               | 15,60                |
| Obs14               | 73,17                             | 53,70                               | 70,42                |
| Obs15               | 85,59                             | 55,22                               | 91,59                |
| Obs16               | 22,00                             | 25,76                               | 20,26                |
| Obs17               | 54,98                             | 43,37                               | 66,28                |
| Obs18               | 55,60                             | 73,91                               | 90,21                |
| Obs19               | 27,50                             | 31,74                               | 16,88                |
| Obs20               | 77,20                             | 48,15                               | 56,74                |
| Obs21               | 89,77                             | 35,54                               | 62,61                |
| Obs22               | 24,09                             | 24,24                               | 19,54                |
| Obs23               | 80,69                             | 61,74                               | 91,15                |
| Obs24               | 87,04                             | 79,78                               | 110,84               |
| Obs25               | 25,25                             | 17,61                               | 14,34                |
| Obs26               | 48,86                             | 55,87                               | 66,74                |
| Obs27               | 51,44                             | 47,39                               | 75,91                |

Values are means of 3 independent replicates; colors represent the relative activities or contents, from blue (for relative low activities or contents) to red (for relative high activities or contents); <sup>1</sup> extraction conditions are described in Table 2; <sup>2</sup> % of DPPH radical scavenging activity; <sup>3</sup> % of *Staphylococcus aureus* ACTT6538 growth inhibition.
